# Supplementary material for: Cancer Malignancy Is Correlated with Upregulation of PCYT2-Mediated Glycerol Phosphate Modification of α-Dystroglycan
Source: MDPI journal article supplement (doi:10.3390/ijms23126662), 2022-06-15
Supplement: s1 [file s1]

## Supplementary Materials

# Cancer malignancy is correlated with upregulation of PCYT2-mediated glycerol phosphate modification of $\alpha$ -dystroglycan

Fumiko Umezawa<sup>1,2,3</sup>, Makoto Natsume<sup>4</sup>, Shigeki Fukusada<sup>4</sup>, Kazuki Nakajima<sup>5,6</sup>, Fumiya Yamasaki<sup>7</sup>, Hiroto Kawashima<sup>7</sup>, Chu-Wei Kuo<sup>8</sup>, Kay-Hooi Khoo<sup>1,8</sup>, Takaya Shimura<sup>4</sup>, Hirokazu Yagi<sup>1,3,\*</sup>, and Koichi Kato<sup>1,2,3,\*</sup>

<sup>1</sup> Exploratory Research Center on Life and Living Systems (ExCELLS) , National Institutes of Natural Sciences, 5-1 Higashiyama, Myodaiji, Okazaki, Aichi 444-8787, Japan; c212803@ed.nagoya-cu.ac.jp (F.U.);

<sup>2</sup> Institute for Molecular Science (IMS), National Institutes of Natural Sciences, 5-1 Higashiyama, Myodaiji, Okazaki, Aichi 444-8787, Japan

<sup>3</sup> Graduate School of Pharmaceutical Sciences, Nagoya City University, 3-1 Tanabe-dori, Mizuho-ku, Nagoya 467-8603, Japan

<sup>4</sup> Graduate School of Medical Sciences, Nagoya City University, 1 Kawasumi, Mizuho-cho, Mizuho-ku, Nagoya 467-8601, Japan; makoto04130510@gmail.com (M.N.); shigeki.f@hotmail.co.jp (S.F.); tshimura@med.nagoya-cu.ac.jp (T.S.)

<sup>5</sup> Center for Joint Research Facilities Support, Research Promotion and Support Headquarters, Fujita Health University, Toyoake, Aichi 470-1192, Japan; knakaji@gifu-u.ac.jp

<sup>6</sup> Institute for Glyco-core Research (iGCORE), Gifu University, 1-1 Yanagido, Gifu 501-1193, Japan

<sup>7</sup> Graduate School of Pharmaceutical Sciences, Chiba University, 1-8-1 Inohana, Chuo-ku, Chiba-shi, Chiba 260-0856, Japan; axxa4826@chiba-u.jp (F.Y.); h-kawashima@chiba-u.jp (H.K.)

<sup>8</sup> Institute of Biological Chemistry, Academia Sinica, 128 Sec. 2, Academia Road, Nankang, Taipei 115, Taiwan; kuocw@gate.sinica.edu.tw, kkhoo@gate.sinica.edu.tw (K.-H.K.)

\* Correspondence: hyagi@phar.nagoya-cu.ac.jp (H.Y.); kkatonmr@ims.ac.jp (K.K.); Tel: +81-52-836-3448 (H.Y.); +81-564-59-5225 (K.K.)

**Table S1: Pathological characteristics and DG2 staining of the tissue microarray.**

| Position | Sex | Age | Anatomic Site           | Pathology                                | Grade  | Stage  | DG2 |
|----------|-----|-----|-------------------------|------------------------------------------|--------|--------|-----|
| A01      | M   | 65  | Bladder, urinary        | Normal                                   | null   | null   | —   |
| A02      | F   | 39  | Bladder, urinary        | Transitional cell carcinoma              | III    | T2N0M0 | +   |
| A03      | M   | 61  | Bladder, urinary        | Transitional cell carcinoma              | III    | T2N0M0 | +   |
| A04      | F   | 34  | Breast                  | Normal breast                            | null   | null   | +   |
| A05      | F   | 43  | Breast                  | Invasive ductal carcinoma                | II     | T3N1M0 | +   |
| A06      | F   | 75  | Breast                  | Invasive ductal carcinoma                | III    | T3N0M0 | +   |
| A07      | M   | 32  | Stomach                 | Normal stomach                           | null   | null   | +   |
| A08      | M   | 66  | Stomach                 | Adenocarcinoma                           | II     | T3N0M0 | +   |
| B01      | M   | 47  | Stomach                 | Adenocarcinoma                           | III    | T3N2M0 | +   |
| B02      | F   | 43  | Intestine, colon        | Normal colon                             | null   | null   | —   |
| B03      | M   | 36  | Intestine, colon        | Adenocarcinoma                           | III    | T3N1M0 | +   |
| B04      | M   | 55  | Intestine, rectum       | Adenocarcinoma                           | I~II   | T3N1M0 | +   |
| B05      | M   | 30  | Kidney                  | Normal kidney cortex                     | null   | null   | +   |
| B06      | F   | 79  | Kidney                  | Cear cell carcinoma                      | null   | T1N0M0 | +   |
| B07      | M   | 72  | Kidney                  | Cear cell carcinoma                      | null   | T1N0M0 | +   |
| B08      | M   | 35  | Liver                   | Normal                                   | null   | null   | +   |
| C01      | M   | 59  | Liver                   | Hepatocellular carcinoma                 | II     | T3N0M0 | +   |
| C02      | M   | 19  | Liver                   | Hepatocellular carcinoma                 | I~II   | T2N0M0 | +   |
| C03      | M   | 59  | Lung                    | Normal                                   | null   | null   | +   |
| C04      | M   | 58  | Lung                    | Squamous cell carcinoma                  | II~III | T2N0M0 | +   |
| C05      | F   | 40  | Lung                    | Adenocarcinoma                           | II~III | T2N0M0 | +   |
| C08      | M   | 42  | Lymph node,<br>axillary | Lymphoma,<br>non-Hodgkin B cell lymphoma | null   | null   | +   |
| D01      | F   | 23  | Ovary                   | Normal                                   | null   | null   | —   |
| D02      | F   | 43  | Ovary                   | Mucinous cystadenocarcinoma              | III    | T2N0M0 | +   |
| D03      | F   | 58  | Ovary                   | Endometrioid adenocarcinoma              | III    | T2N0M0 | +   |
| D04      | F   | 58  | Pancreas                | Normal                                   | null   | null   | +   |
| D05      | F   | 49  | Pancreas                | Adenocarcinoma                           | II     | T3N1M1 | +   |
| D07      | M   | 73  | Prostate                | Normal                                   | null   | null   | +   |
| D08      | M   | 63  | Prostate                | Adenocarcinoma                           | III    | T3N0M0 | +   |
| E01      | M   | 60  | Prostate                | Adenocarcinoma                           | II     | T2N0M0 | +   |
| E03      | M   | 34  | Penis                   | Squamous cell carcinoma                  | I      | T1N0M0 | +   |

|     |   |    |                        |                         |        |        |   |
|-----|---|----|------------------------|-------------------------|--------|--------|---|
| E04 | M | 73 | Skin                   | Melanoma                | null   | null   | + |
| E05 | F | 46 | Uterus                 | Normal                  | null   | null   | — |
| E06 | F | 41 | Uterus, cervix         | Squamous cell carcinoma | I~II   | T1N1M0 | + |
| E07 | F | 53 | Uterus,<br>endometrium | Adenocarcinoma          | II~III | T1N1M0 | + |

Staining with DG2 was classified as negative; — and positive; +.

**Figure S1**

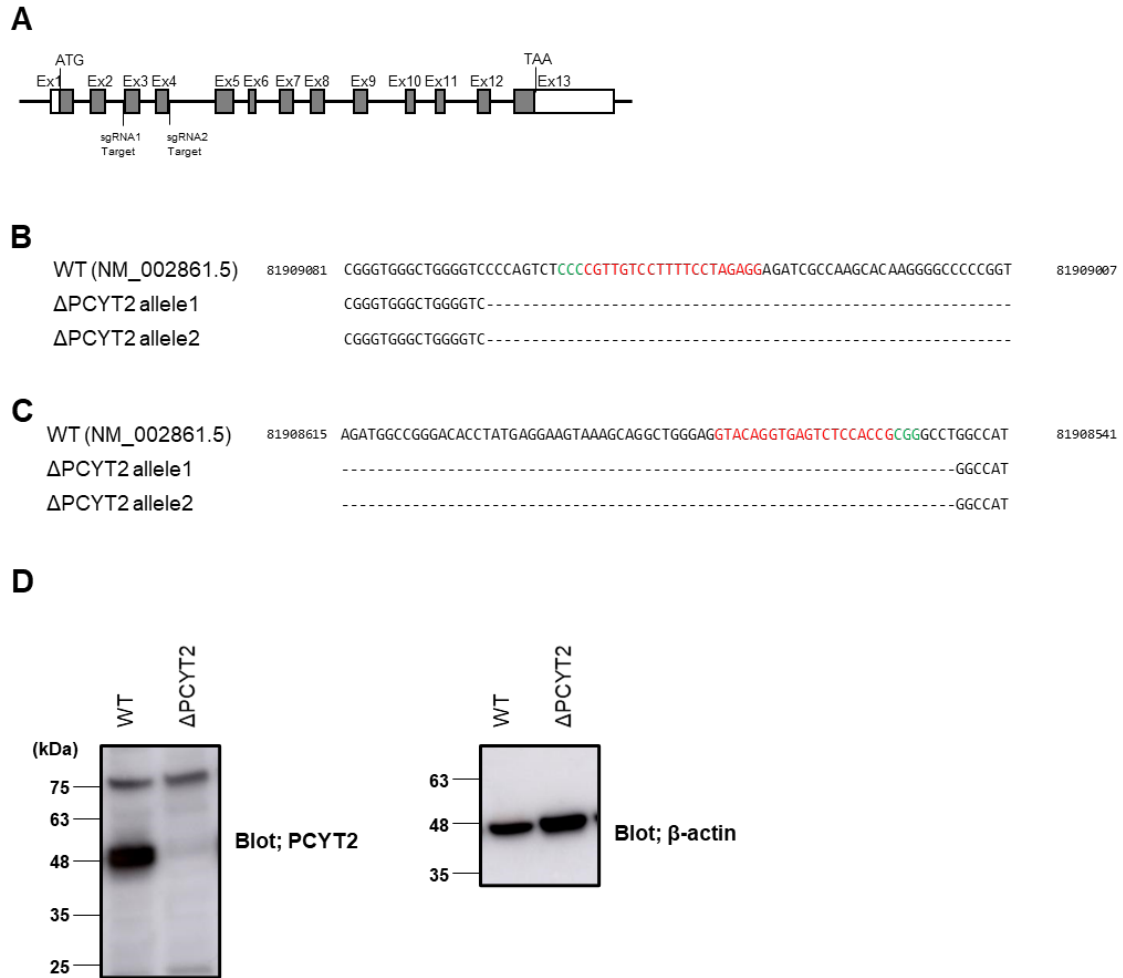

**Figure S1: Editing of PCYT2 gene by the CRISPR/Cas9 system.** (A) Schematic representation of the genomic target sites in the PCYT2 gene. Exons, indicated by rectangles, are numbered from Ex1 to Ex13. The coding portions of the gene are shaded. The open portions of exons 1 and 13 represent the 5' UTR and 3' UTR, respectively. (B, C) Genotyping results of PCYT2-KO cells. Genomic DNAs from wild-type (WT) and KO cells were isolated, and PCR amplicons flanking the CRISPR/Cas9-targeted regions were sequenced. Sequence alignments of bases (B) 81909081-81909007 and (C) 81908615-81908541 of the PCYT2 gene locations are shown. The sequences of gRNAs and PAM are labeled in red and green; -, nucleotide deletion. Numbering is based on the entire PCYT2 gene sequence using the reference gene RefSeq NM\_002861.5. (D) PCYT2 protein expression level in WT and PCYT2-KO (ΔPCYT2) cells were analyzed by immunoblotting with anti-PCYT2 and anti-β-actin antibodies. The equal amount of protein in each sample was adjusted and loaded for Western blotting.

**Figure S2**

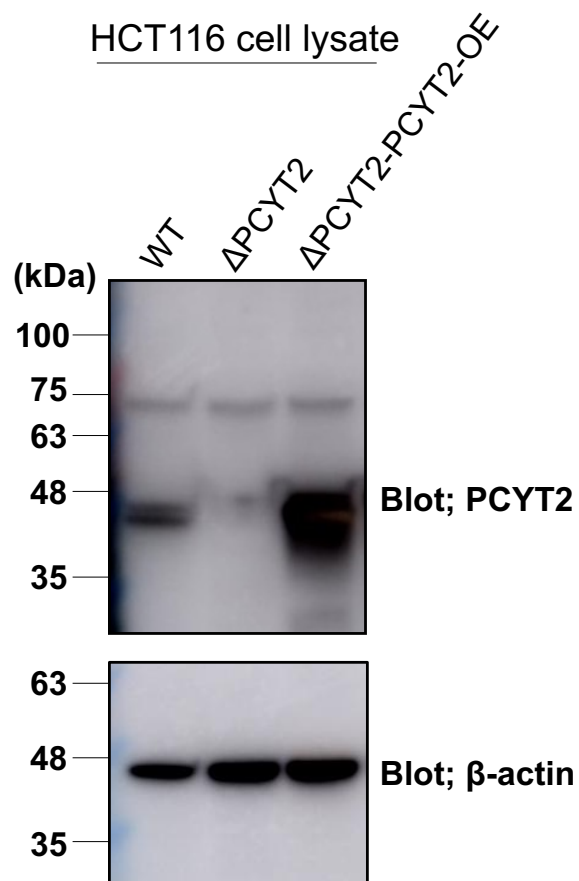

**Figure S2: PCYT2 expression in HCT116 wild-type, PCYT2-KO, and PCYT2-rescue cells.**

Cell lysates containing equal amounts of total proteins that were prepared from HCT116 wild-type (WT), PCYT2-KO ( $\Delta$ PCYT2), and PCYT2-KO rescue ( $\Delta$ PCYT2-PCYT2-OE) cells were subjected to immunoblot analysis using anti-PCYT2 and anti- $\beta$ -actin antibodies.
